# Supplementary material for: A polyaniline wrapped aminated graphene composite on nickel foam as three-dimensional electrodes for enzymatic microfuel cells
Source: Royal Society of Chemistry journal article supplement (doi:10.1039/c6ra08195a), 2016-01-01
Supplement: c6ra08195a1.pdf [file c6ra08195a1.pdf]

# Supporting Information

## Polyaniline Wrapped Aminated Graphene Composite on Nickel Foam as Three-Dimensional Electrodes for Enzymatic Microfuel Cell

Rudra Kumar<sup>1#</sup>, T Bhuvana<sup>2†##</sup>, Gargi Mishra<sup>1</sup> and Ashutosh Sharma<sup>1\*</sup>

<sup>1</sup>Department of Chemical Engineering, Indian Institute of Technology, Kanpur 208016, India

<sup>2</sup>Department of Mechanical Engineering, Indian Institute of Technology, Kanpur 208016, India

<sup>†</sup>Major part of work was performed when the author was part of Department of Chemical Engineering, Indian Institute of Technology, Kanpur 208016, India

# contributed equally

\***Email:** [bhuvana@iitk.ac.in](mailto:bhuvana@iitk.ac.in), [ashutos@iitk.ac.in](mailto:ashutos@iitk.ac.in)

### Characterisation of GO, NH<sub>2</sub>-G, PANi and NH<sub>2</sub>-G/PANi by AFM, FTIR, Raman and XRD:

Polyaniline wrapped aminated graphene (NH<sub>2</sub>-G/PANi) was synthesized through *in-situ* aniline polymerisation on the surface of aminated graphene sheets in the acidic condition.<sup>1</sup> The characterization was carried out using AFM, FTIR, Raman spectroscopy and XRD. AFM image in Figure S1a demonstrated the size variation in GO nanosheets. The lateral dimension of nanosheets was found to vary between 1 to 4 μm with uniform thickness in the range of 1 nm. In FTIR spectra (Figure S1b), peaks identified at 1628 and 1723 cm<sup>-1</sup> in GO corresponded to C=O bonds of carbonyl and carboxylic acid, respectively, while peak detected at 3434 cm<sup>-1</sup> was identified as hydrogen bonds present in O-H group. Further, the peaks observed at 655 cm<sup>-1</sup> and 1224 cm<sup>-1</sup> corresponded to the epoxy group and C-O bonds, respectively. After amine functionalization, the significant decay of 3434, 1723, and 1628 cm<sup>-1</sup> peaks indicated the successful reduction and surface functionalization of GO.<sup>2</sup> The N-H plane stretching of

aminated graphene was observed at  $1580\text{ cm}^{-1}$ , while the N-H bond stretching was observed at  $3300\text{--}3500\text{ cm}^{-1}$ . Further the peak observed at  $1020\text{--}1250\text{ cm}^{-1}$  arose from stretching mode of C-N bond present in aromatic amines.<sup>3</sup> In FTIR spectra of PANi, peaks detected at  $1481\text{ cm}^{-1}$  and  $1293\text{ cm}^{-1}$  corresponded to the quinoid ring distortion with the vibration of C=C bond and benzoid ring deformation with the stretching of C-N bond, respectively. Raman spectroscopy carried out on NH<sub>2</sub>-G sample showed peaks at  $1344$  and  $1590\text{ cm}^{-1}$  attributed to disordered phase (D) and graphitic (G) phase of carbon, respectively (FigureS1c). The intensity ratio between D band and G band also confirmed the disordered and graphitic nature of carbon. The intensity of G band is lower than D band in NH<sub>2</sub>-G indicated the increase in disordering of graphite with the amine functionalization.<sup>4</sup> In the case of PANi, peaks observed at  $1160$ ,  $1172$  and  $1504\text{ cm}^{-1}$  are assigned to aniline ring vibration due to C-H bond stretching, C-H and N-H bending vibrations, respectively. The bipolaronic vibrations of quinoid ring were identified by the peaks at  $572$ ,  $638$ ,  $720$  and  $812\text{ cm}^{-1}$ . The polaronic vibration of amine was observed at  $512\text{ cm}^{-1}$ . Further, the peak at  $406\text{ cm}^{-1}$  corresponded to the polaronic torsion in C-N-C bond.<sup>5</sup> For NH<sub>2</sub>-G/PANi, the peak identified at  $1590\text{ cm}^{-1}$  were broader as compared to NH<sub>2</sub>-G curve, which confirmed the effective unification of polyaniline with the aminated graphene.<sup>6</sup> XRD peaks observed at  $11.1^\circ$  of (001) plane confirmed the formation of GO with the interlayer spacing of  $\sim 0.79\text{ nm}$  (Figure S1d). After the solvothermal treatment of GO with ethylene glycol and aqueous ammonia, the peak was observed at  $2\theta \sim 23.6^\circ$  with the interlayer *d*-spacing of  $\sim 0.37\text{ nm}$  confirmed the formation of NH<sub>2</sub>-G. The peak broadening occurred due to loose attachment of aminated graphene. The XRD peak of PANi was observed at  $2\theta \sim 23.4^\circ$ . The interlayer spacing was calculated to be  $\sim 0.35\text{ nm}$ . The slight shifting of peak for NH<sub>2</sub>-G/PANi composite confirmed the wrapping of PANi over graphene with the interlayer spacing of  $\sim 0.39\text{ nm}$ .<sup>1</sup>

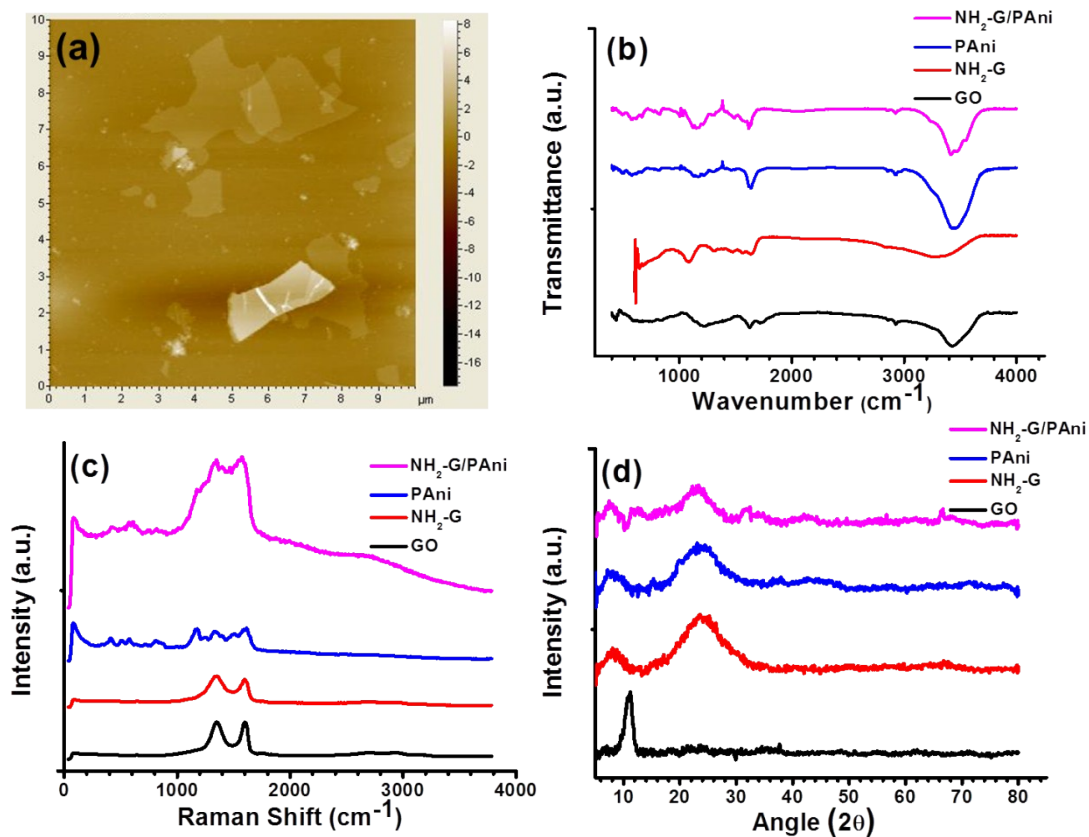

Figure S1: FTIR, Raman and XRD

**Figure S1:** (a) AFM (b) FTIR (c) Raman and (d) XRD pattern of GO, NH<sub>2</sub>-G, PANi and NH<sub>2</sub>-G/PAni composite.

**Morphological Characterization:** FESEM images of NH<sub>2</sub>-G/PAni-2 and NH<sub>2</sub>-G/PAni-3 composites are shown in Figure S2. From the images, it is evident as PANi content was increased as in the case of NH<sub>2</sub>-G/PAni-3, the composite morphology appeared more like PANi i.e., more grainy in nature and less of flake like structure as seen for NH<sub>2</sub>-G/PAni-2.

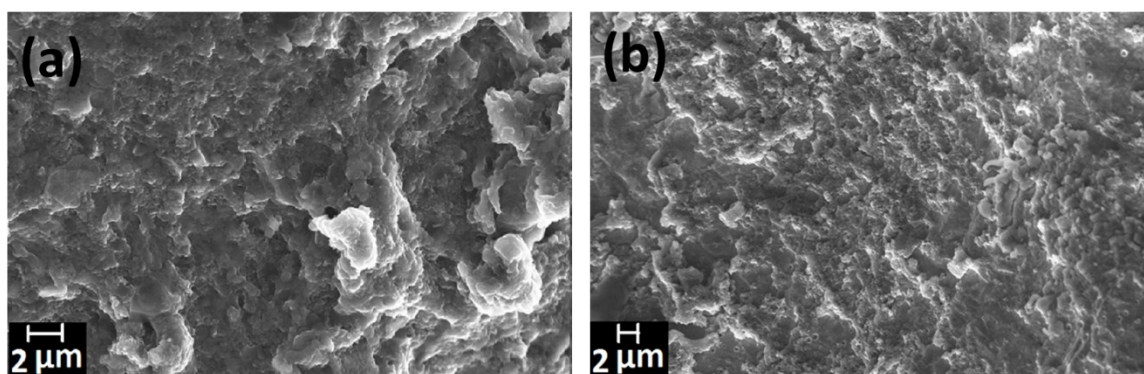

**Figure S2:** FESEM images of (a) NH<sub>2</sub>-G/PAni-2 and (b) NH<sub>2</sub>-G/PAni-3 composites.

**Cyclic Voltammogram Studies:** CV performed on bare and amine functionalized Ni foam after attachment of enzyme using cross-linker molecule is shown in Figure S3. The scan was performed in the voltage range -0.2 to +0.6 V vs Ag/AgCl as reference electrode and platinum wire as counter electrode at 10 mV s<sup>-1</sup>.

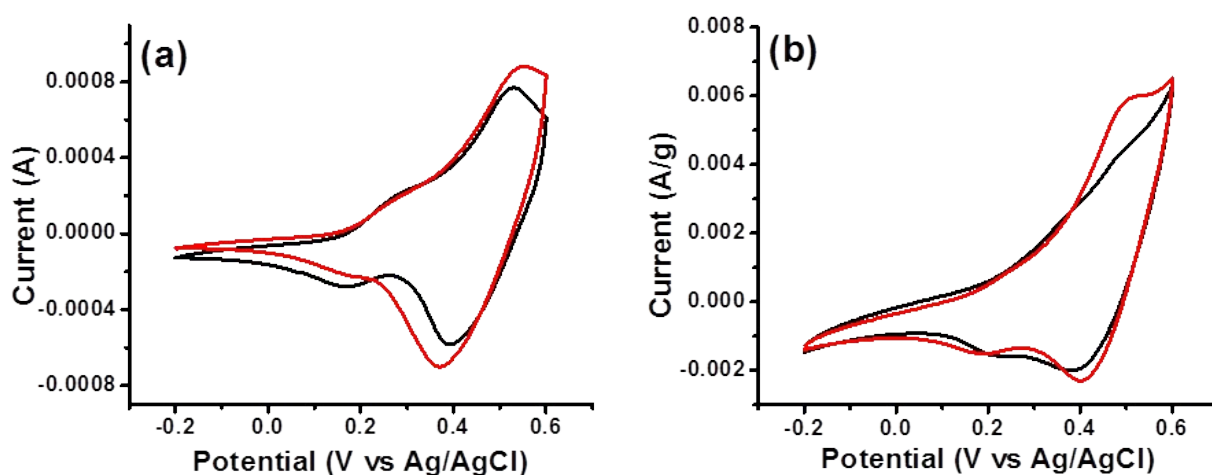

**Figure S3:** Cyclic voltammogram for PEGDGE:GOx (1:2) immobilized on (a) bare and (b) amine functionalized Ni foam in absence (black) and presence (red) of glucose at 10 mVs<sup>-1</sup>.

#### **Doping and Stability of GOx Enzyme on Electrode Surface:**

Immobilization of enzyme was analyzed by measuring the FITC-labelled glucose oxidase enzyme present on the electrodes. For this purpose, electrodes were immobilized in FITC-labelled GOx solution for 24 hours and washed thrice with PBS solution. UV-Visible absorption spectra was recorded for FITC-labelled GOx solution, the resultant solution after electrode immobilization. **Figure S4** showed the absorption curve obtained for amine functionalized Ni foam and NH<sub>2</sub>-G/PAni-1 electrodes that were prepared using third protocol. From **Figure S4a**, it is clear that enzyme attachment is very poor onto amine functionalized Ni foam electrode as more than 85% enzyme has been estimated in the discarded solution.

However, in the case of amine functionalized  $\text{NH}_2\text{-G/PAni-1}$  shown in **Figure S4b**, almost 68 % enzymes are retained onto the electrode and they are intact after subsequent washes. **Table S1** detailed of the amount of enzyme present on the electrode surface of Ni and  $\text{NH}_2\text{-G/PAni-1}$  for the three protocols adopted. The results clearly indicate that enzyme attachment is better on the composite material and best results are obtained for amine functionalized  $\text{NH}_2\text{-G/PAni-1}$ .

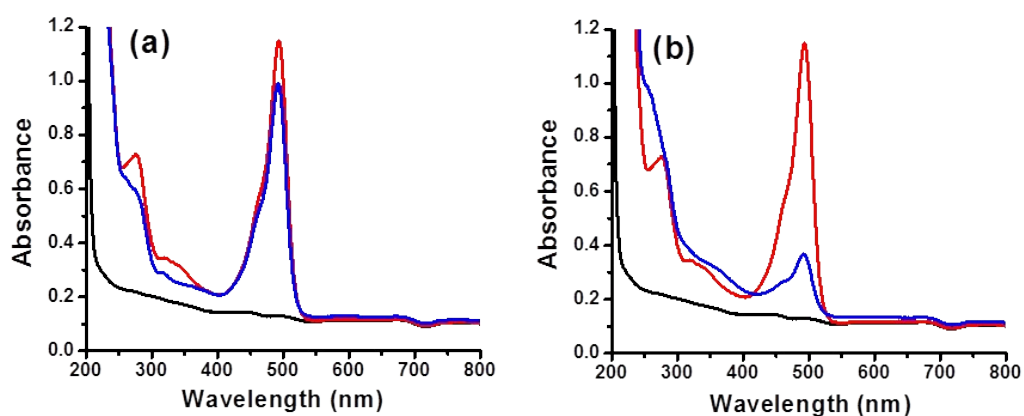

**Figure S4:** Absorption curve obtained for amine functionalized (a) Ni foam and (b)  $\text{NH}_2\text{-G/PAni-1}$  electrodes that prepared using third protocol. Legend: Red- FITC labelled GOx-PEGDGE in PBS solution, Blue- after washing and Black – PBS solution.

**Table S1:** Estimation of amount of GOx washed off after immobilization using three different protocol for amine functionalized (a) Ni foam and (b)  $\text{NH}_2\text{-G/PAni-1}$  electrodes.

| Sample                                | Wash 1 (%) |
|---------------------------------------|------------|
| Ni Proto-1                            | 83.40      |
| Ni Proto-2                            | 91.79      |
| Ni Proto-3                            | 86.28      |
| $\text{NH}_2\text{-G/PAni-1}$ Proto-1 | 58.99      |
| $\text{NH}_2\text{-G/PAni-1}$ Proto-2 | 53.33      |
| $\text{NH}_2\text{-G/PAni-1}$ Proto-3 | 32.06      |

To visualize the immobilization of enzymes on various electrodes surfaces, we have carried out fluorescence imaging. We have used FITC labelled GOx enzyme for immobilization to monitor them under fluorescence microscope. In **Figure S5** fluorescence image captured from various electrodes are shown. The green fluorescent signal is very weak from Ni, PANi and NH<sub>2</sub>-G based electrodes (see **Figure S5a-c** respectively) and good from NH<sub>2</sub>-G/Pani-1 composite coated electrode (see **Figure S5d-f**). The best results are obtained for amine functionalized NH<sub>2</sub>-G/Pani-1 coated electrode utilizing PEGDGE cross-linker molecule as it shows uniform green fluorescence speckled over the surface of the electrode. Hence, it can be concluded that immobilization utilizing PEGDE as cross-linker is most effective in chemically bonding the enzyme onto the electrode surface.

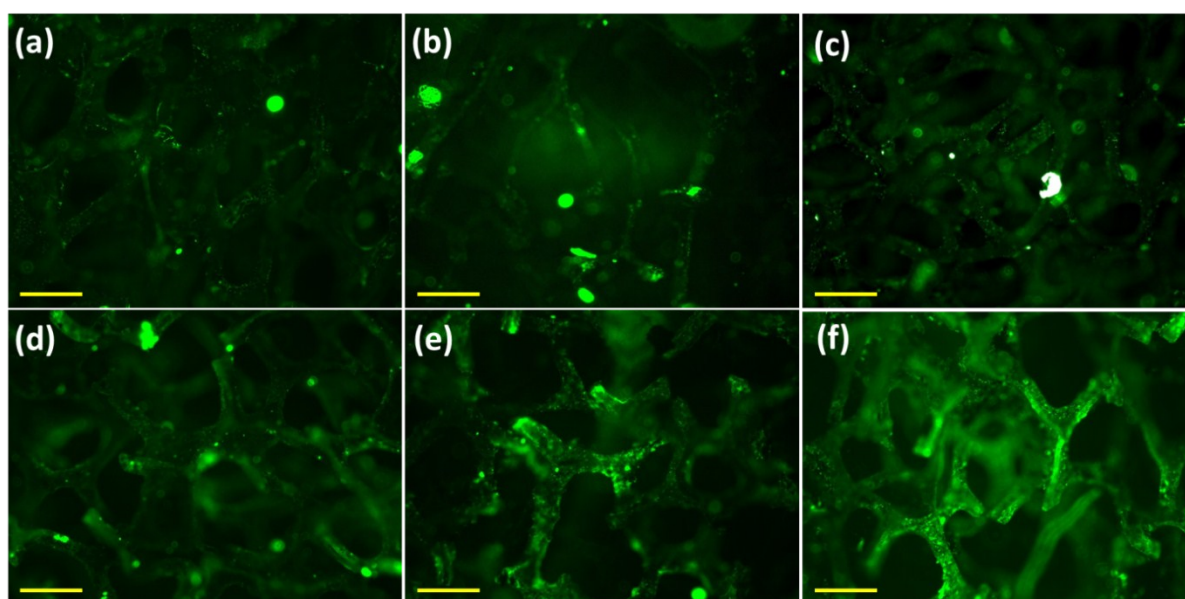

**Figure S5:** Fluorescence image obtained for FITC labelled GOx-PEGDGE for (a) Ni foam, (b) PANi and (c) NH<sub>2</sub>-G and on NH<sub>2</sub>-G/Pani-1 electrode after following three protocols (d-f) respectively (scale -100  $\mu$ m).

For checking the stability of enzymes on the electrode surface, we have performed cyclic voltammogram on the electrode, stored the same for six weeks at 4 °C in PBS solution and then performed the cyclic voltammogram again. The change in current was less than 9% from the

initial run as seen in **Figure S6**. This results indicate that enzymes were quite stable and enzyme activity losses due to storage and several runs was quite small and negligible.

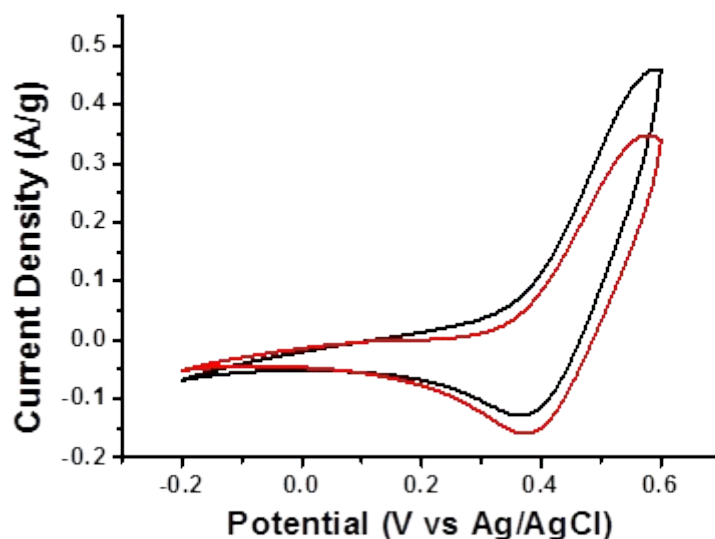

**Figure S6:** Cyclic voltammogram on NH<sub>2</sub>-G/Pani-1 electrode before (black) and after (red) storage for 6 weeks in PBS solution.

## References

1. R. Kumar, K. Jahan, R. K. Nagarale and A. Sharma, *ACS Appl. Mater. Interfaces*, 2015, **7**, 593-601.
2. L. Lai, L. Chen, D. Zhan, L. Sun, J. Liu, S. H. Lim, C. K. Poh, Z. Shen and J. Lin, *Carbon*, 2011, **49**, 3250-3257.
3. A. Ray, G. E. Asturias, D. L. Kershner, A. F. Richter, A. G. MacDiarmid and A. J. Epstein, *Synth. Met.*, 1989, **29**, 141-150.
4. O. C. Compton, D. A. Dikin, K. W. Putz, L. C. Brinson and S. T. Nguyen, *Adv. Mat.*, 2010, **22**, 892-896.
5. L. Al-Mashat, K. Shin, K. Kalantar-zadeh, J. D. Plessis, S. H. Han, R. W. Kojima, R. B. Kaner, D. Li, X. Gou, S. J. Ippolito and W. Wlodarski, *J. Phys. Chem. C*, 2010, **114**, 16168-16173.
6. W. Sun, T. Peng, Y. Liu, S. Xu, J. Yuan, S. Guo and X.-Z. Zhao, *J. Mater. Chem. A*, 2013, **1**, 2762-2768.
